# Supplementary material for: Abilities of Canine Shelter Behavioral Evaluations and Owner Surrender Profiles to Predict Resource Guarding in Adoptive Homes
Source: MDPI journal article supplement (doi:10.3390/ani10091702), 2020-09-20
Supplement: s1 [file s1]

**Table S1.** Questions selected for analysis from three sections of the Tompkins County SPCA's Owner Surrender Profile Form. Our method of scoring owner responses is shown in parentheses.

Section 1: Reason for surrendering

Why are you surrendering your dog to the shelter (Circle all that apply)?

Options provided: behavioral problems, time commitment, family issues, health issues (owner), health issues (dog), and other.

(We scored this as yes when the option behavioral problems was circled by surrendering owners.)

Section 2: Resource guarding

What does your dog do when you or someone else:

go near the food bowl? \_\_\_\_\_

try to take away toys, rawhides, or anything else of value? \_\_\_\_\_

(We scored this as yes when at least one incident of growling, snarling, snapping, nipping, or biting was reported by surrendering owners.)

Section 3: Visible signs of aggression

Has your dog ever snarled at you or anyone else? Yes\_\_\_\_No\_\_\_\_If yes, please explain the situation.

\_\_\_\_\_  
Has your dog ever growled at you or anyone else? Yes\_\_\_\_No\_\_\_\_If yes, please explain the situation.

\_\_\_\_\_  
Has your dog ever snapped at you or anyone else? Yes\_\_\_\_No\_\_\_\_If yes, please explain the situation.

\_\_\_\_\_  
Has your dog ever nipped at you or anyone else? Yes\_\_\_\_No\_\_\_\_If yes, please explain the situation.

\_\_\_\_\_  
Has your dog ever bitten (broken skin) you or anyone else? Yes\_\_\_\_No\_\_\_\_If yes, please explain the situation.

\_\_\_\_\_  
(We scored this as yes when the owner reported the dog had displayed at least one of the five behaviors.)
